# Supplementary material for: Three dimensional plasmonic assemblies of AuNPs with an overall size of sub-200 nm for chemo-photothermal synergistic therapy of breast cancer
Source: Royal Society of Chemistry journal article supplement (doi:10.1039/c6nr07172d), 2016-01-01
Supplement: c6nr07172d1.pdf [file c6nr07172d1.pdf]

## Supporting Information

1

2

### 3 **Three dimensional plasmonic assemblies of AuNPs with overall size of sub-200 nm for chemo-** 4 **photothermal synergistic therapy of breast cancer†**

5

6 Yuanzhi Xia,<sup>a,b</sup> Xiaoxia Wu,<sup>b</sup> Jingtai Zhao,<sup>a</sup> Jinshun Zhao,<sup>c</sup> Zihou Li,<sup>b</sup> Wenzhi Ren,<sup>b</sup> Yuchen Tian,<sup>b</sup>  
7 Aiguo Li,<sup>d</sup> Zheyu Shen<sup>\*b</sup> and Aiguo Wu<sup>\*b</sup>

8

9 *<sup>a</sup>School of Material Science and Engineering, Shanghai University, 149 Yanchang Road, Shanghai*  
10 *200072, China.*

11 *<sup>b</sup>Key Laboratory of Magnetic Materials and Devices & Key Laboratory of Additive Manufacturing*  
12 *Materials of Zhejiang Province & Division of Functional Materials and Nanodevices, Ningbo*  
13 *Institute of Materials Technology and Engineering, Chinese Academy of Sciences, 1219 Zhong-*  
14 *guan West Road, Zhen-hai District, Ning-bo, Zhe-jiang 315201, P. R. China.*

15 *<sup>c</sup>Public Health Department of Medical School, Zhejiang Provincial Key Laboratory of Pathological*  
16 *and Physiological Technology, Ningbo University, 818 Fenghua Road, Ningbo, Zhejiang 315211,*  
17 *China.*

18 *<sup>d</sup>Shanghai Synchrotron Radiation Facility, Shanghai Institute of Applied Physics, Chinese Academy*  
19 *of Sciences, Shanghai, 201204, China.*

20 † Electronic supplementary information (ESI) available.

21

### 22 **Corresponding Authors**

23 \*E-mail: shenzheyu@nimte.ac.cn; Tel: +86 574 87617278

24 \*E-mail: aiguo@nimte.ac.cn; Tel: +86 574 86685163

25

26

### 27 **Table of Contents**

28 **Figure S1.** Characterization of the AuNPs-DOX@BSA by TEM, DLS and UV-vis.....S2

29 **Figure S2.** Infrared thermal imaging and photothermal heating curves.....S3

30 **Figure S3.** Stability of the AuNPs-DOX-BSA4-FA in aqueous solution.....S4

31 **Figure S4.** The release behavior of DOX from AuNPs-DOX@BSA4-FA.....S5

32 **Figure S5.** XFM images of the MCF-7 cells.....S6

33 **Figure S6.** Cell viability of MCF-7 cells treated with laser irradiation.....S7

34 **Figure S7.** The in vivo distribution of AuNPs-DOX@BSA4-FA.....S8

35 **Figure S8.** Representative photos of MCF-7 tumor-bearing mice.....S9

36 **Figure S9.** Photos of tumor-bearing mice after injection of saline.....S10

37 **Figure S10.** Photos of tumor-bearing mice after injection of free DOX.....S11

38 **Figure S11.** Photos of tumor-bearing mice after injection of AuNPs-DOX@BSA4-FA.....S12

39 **Figure S12.** Photos of tumor-bearing mice after injection of AuNPs-DOX@BSA4-FA with laser  
40 irradiation.....S13

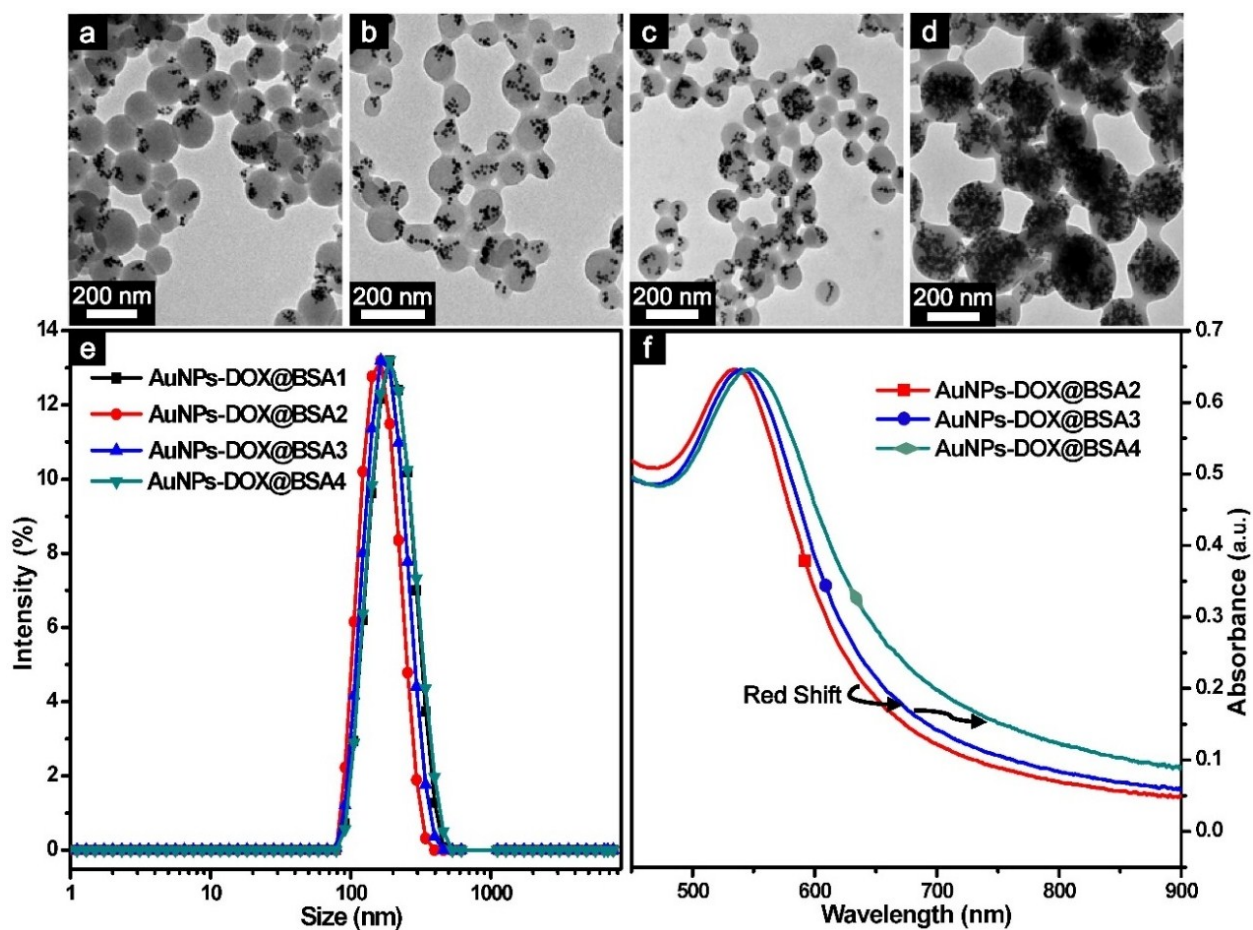

1  
 2 **Figure S1.** Characterization of the AuNPs-DOX@BSA by TEM, DLS and UV-vis. (a-d): TEM  
 3 image of AuNPs-DOX@BSA1-4; (e): Size distribution of AuNPs-DOX@BSA1-4; (f): UV-vis  
 4 absorbance spectra of AuNPs-DOX@BSA2-4.

5

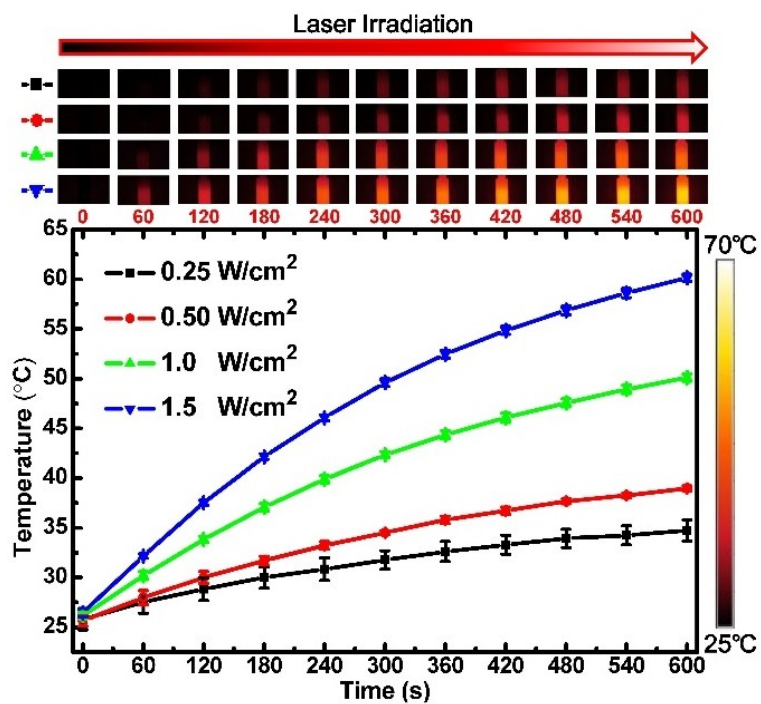

1

2 **Figure S2.** Infrared thermal imaging and photothermal heating curves for AuNPs-DOX@BSA4  
 3 aqueous dispersion at 1.0 mg/mL with an 808 nm of NIR laser irradiation and various power  
 4 density (0.25-1.5 W/ cm<sup>2</sup>).

5

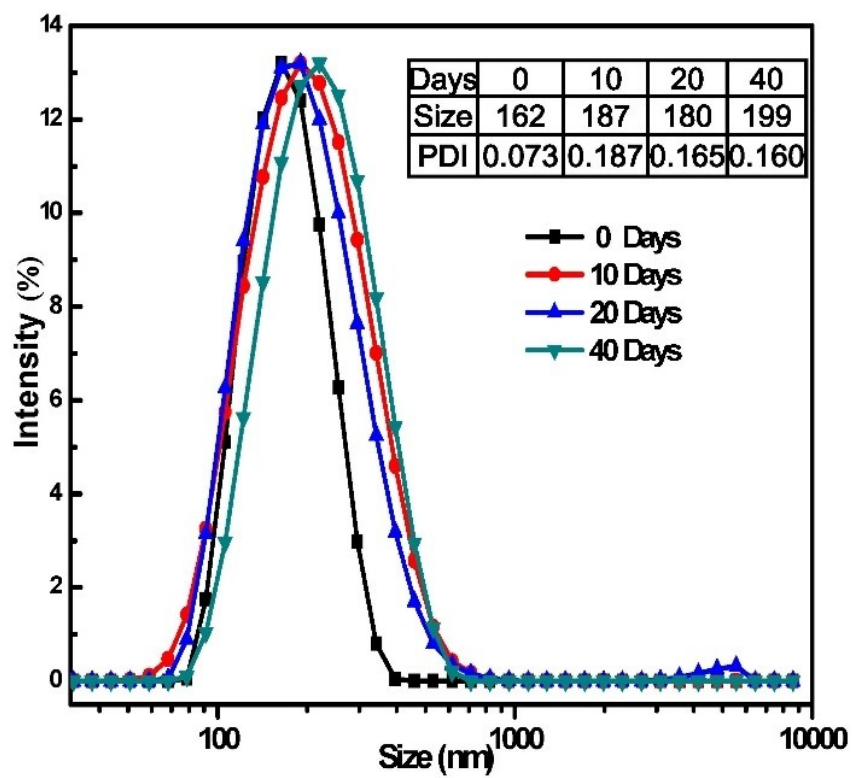

1

2 **Figure S3.** Change in size distribution of the AuNPs-DOX-BSA4-FA measured by DLS during  
 3 storage at 4 °C.

4

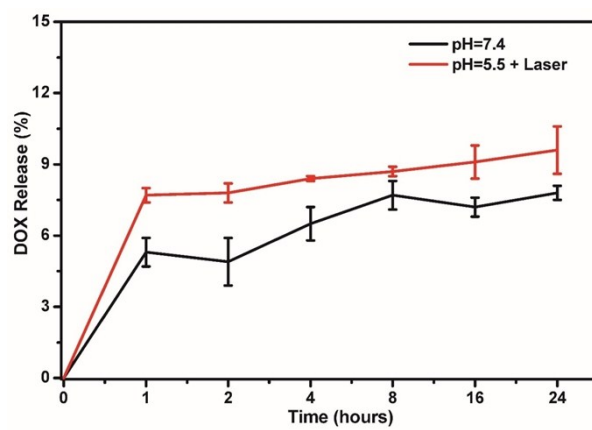

1

2 **Figure S4.** The release behavior of DOX from AuNPs-DOX@BSA4-FA at pH 7.4 or 5.5 with or  
3 without a 808 nm laser irradiation (1.5 W/cm<sup>2</sup>, 5 min).

4

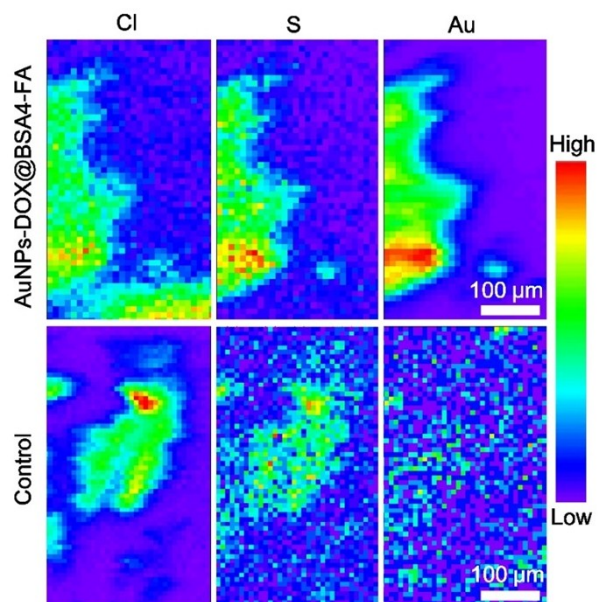

1

2 **Figure S5.** XFM images of the MCF-7 cells incubated with AuNPs-DOX@BSA4-FA for 4 h  
 3 showing element fluorescence of Cl, S and Au. The MCF-7 cells without incubation of AuNPs-  
 4 DOX@BSA4-FA is used as the control.

5

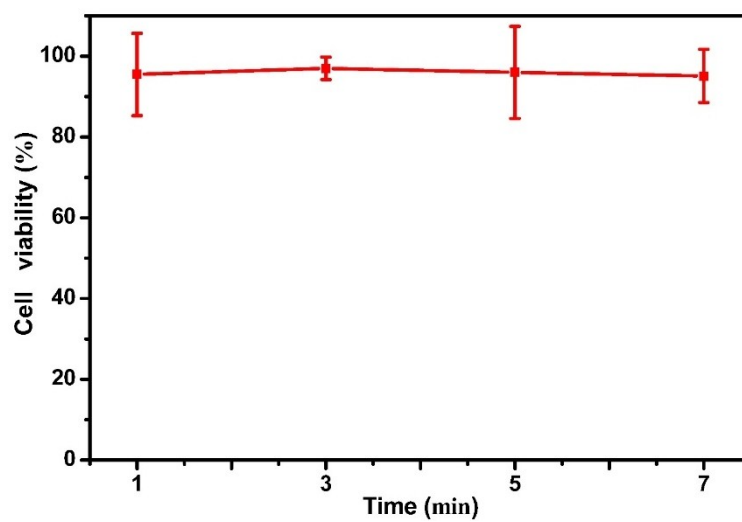

1

2 **Figure S6.** Cell viability of MCF-7 cells treated with laser irradiation (808 nm, 2.0 W/cm<sup>2</sup>) for  
3 various irradiation time without administration of any nanoparticles.

4

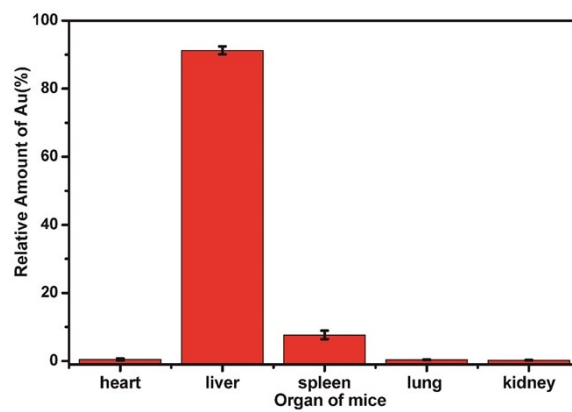

1

2 **Figure S7.** The in vivo biodistribution of AuNPs-DOX@BSA4-FA after 24 h of intravenous  
3 injection (200  $\mu$ L, 2.0 mg/mL).

4



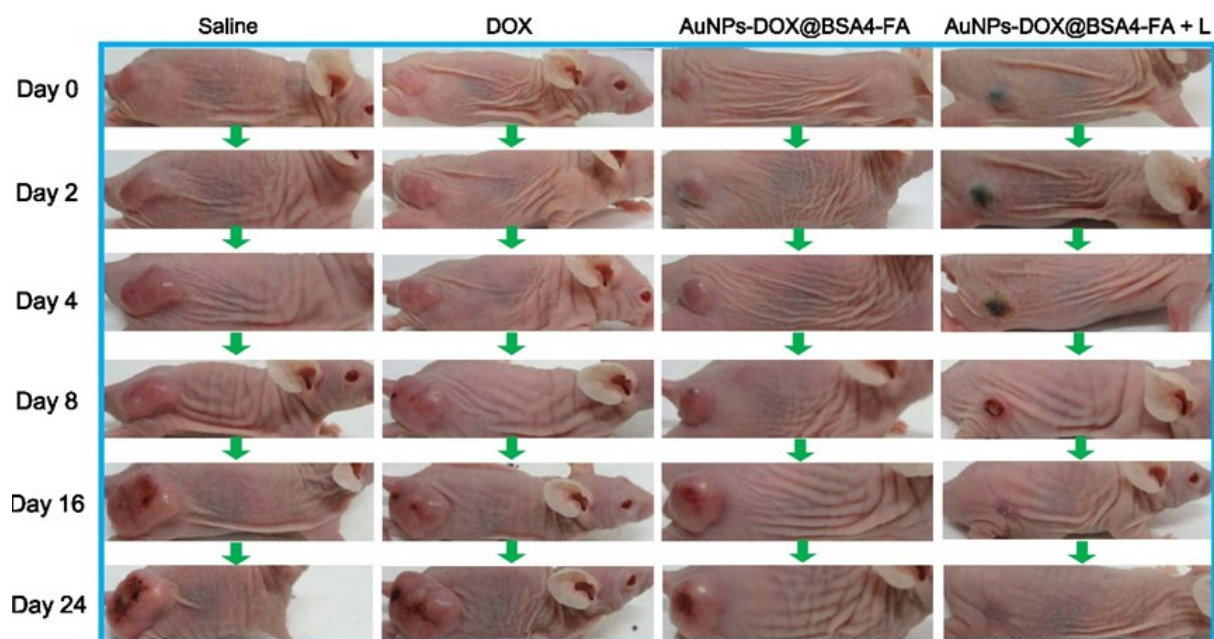

1

2 **Figure S8.** Representative photos of the four groups (Saline, DOX, AuNPs-DOX@AN4-FA, or  
 3 AuNPs-DOX@AN4-FA + Laser) of MCF-7 tumor-bearing mice during the period of therapies.

4

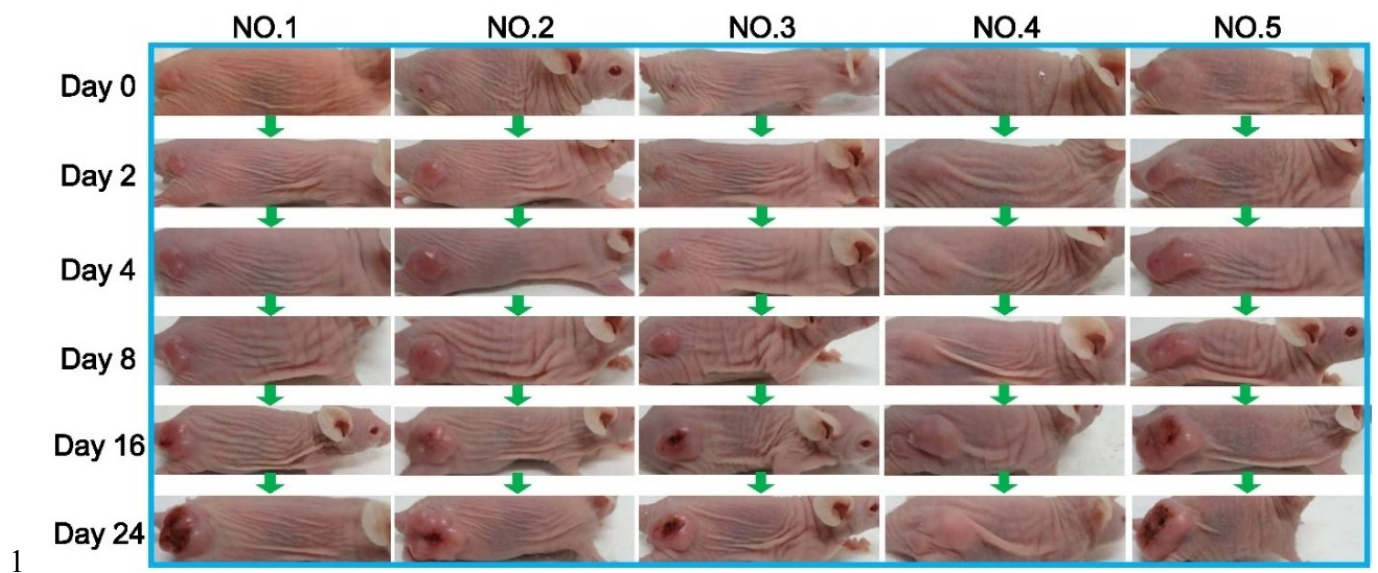

1  
2 **Figure S9.** The photos of five MCF-7 tumor-bearing mice after injection of saline (saline group).  
3

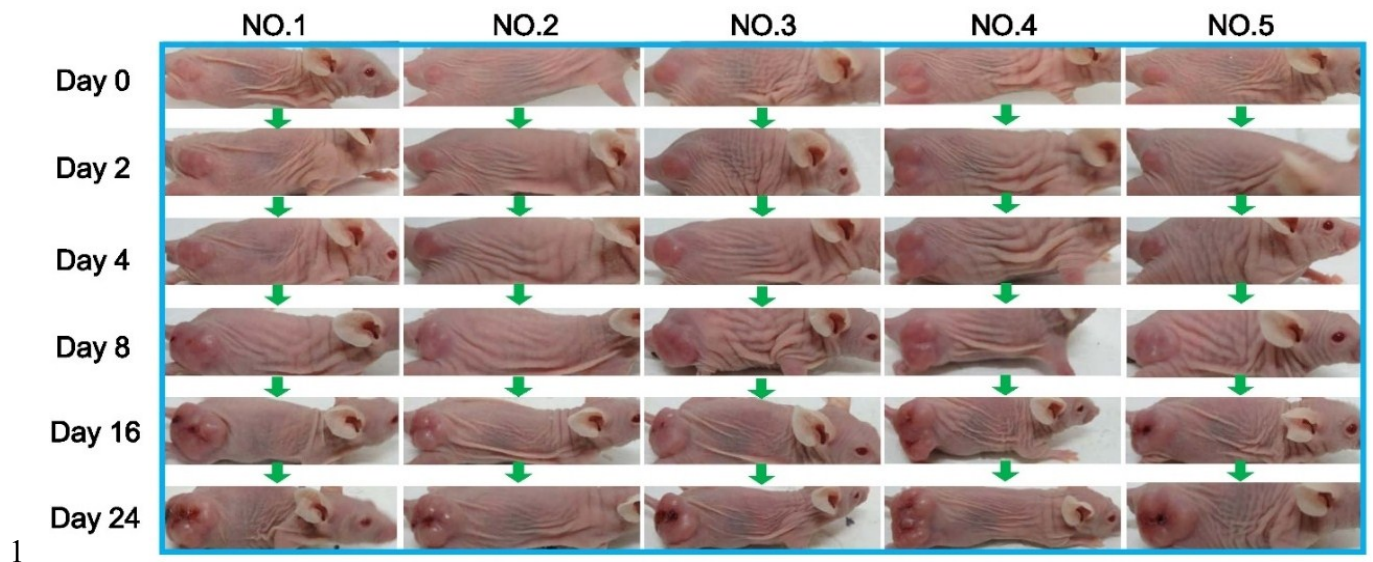

1  
2 **Figure S10.** The photos of five MCF-7 tumor-bearing mice after injection of free DOX (DOX  
3 group).  
4

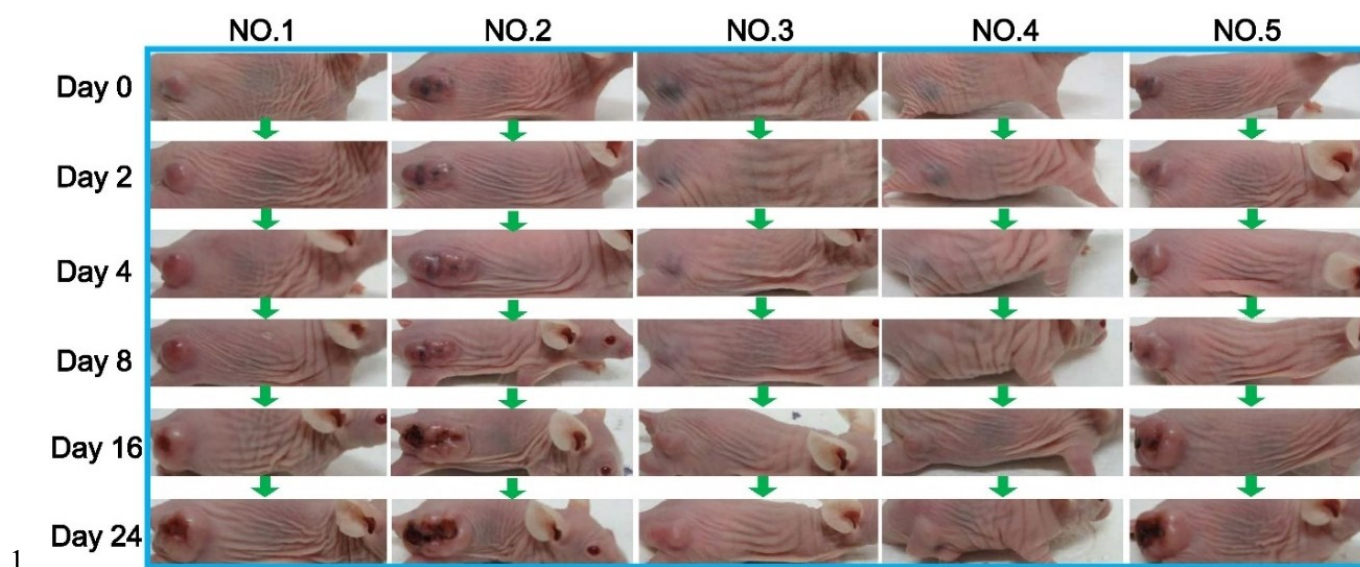

1  
2 **Figure S11.** The photos of five MCF-7 tumor-bearing mice after injection of AuNPs-DOX@BSA4-  
3 FA (AuNPs-DOX@BSA4-FA group).

4



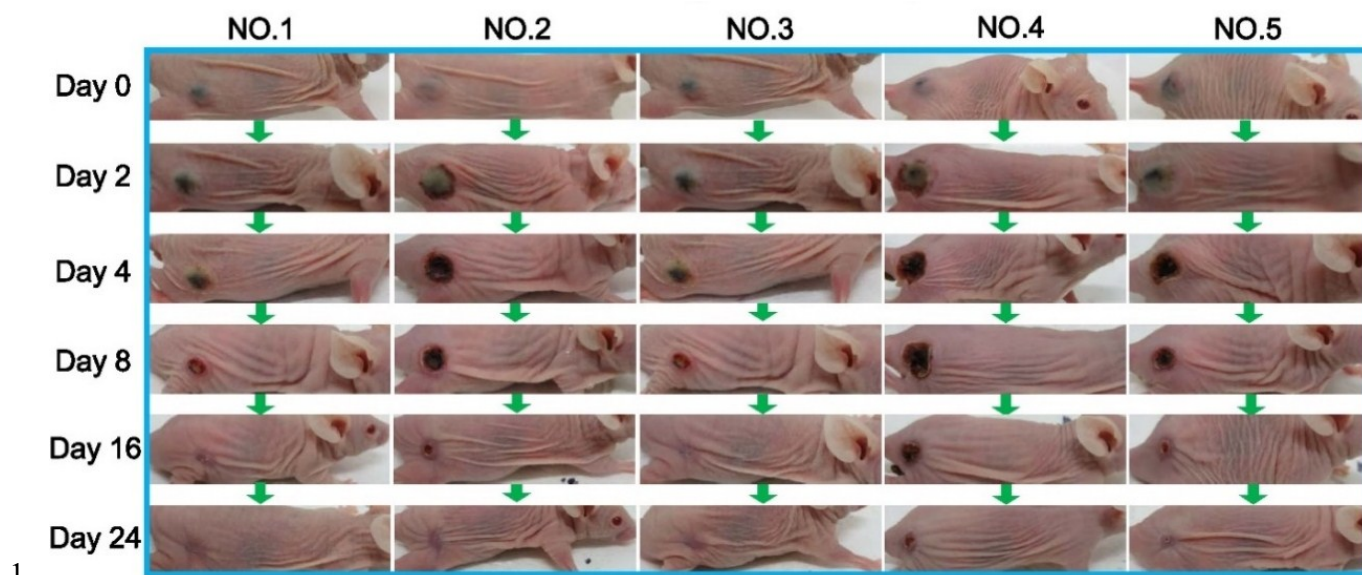

1

2 **Figure S12.** The photos of five MCF-7 tumor-bearing mice after injection of AuNPs-DOX@BSA4-  
3 FA and laser irradiation (AuNPs-DOX@BSA4-FA + L group).

4
